# Supplementary material for: Terrestrial and marine plastic pollution outlook in the Mediterranean region: a box-model approach based on OECD policy scenarios
Source: Copernicus journal article supplement (doi:10.5194/egusphere-2024-3031), 2024-11-21
Supplement: Supplementary file 1 [file egusphere-2024-3031-supplement.zip]

# SUPPLEMENTARY INFORMATION

## PLASTIC POLLUTION OUTLOOK IN THE MEDITERRANEAN REGION AND SEA: A BOX-MODEL APPROACH BASED ON OECD POLICY SCENARIOS.

Théo Segur & Jeroen E. Sonke

Géosciences Environnement Toulouse, CNRS/IRD/Université Toulouse 3 Paul Sabatier, Toulouse, France

### I. Code availability

The model code is available on: [https://github.com/TheoSEGUR/Med\\_Plastic\\_BoxModel.git](https://github.com/TheoSEGUR/Med_Plastic_BoxModel.git)

### II. Model parameters

**Table S1:** Model parameters and their probability distribution (miscellaneous parameters).

5 R1: S. Europe, R2: N. Africa & M. East, R3: Nile basin.

| Parameter name | Description                                                                    | Mean $\pm$ sd                     | Median (IQR 25%-75%)                                  |
|----------------|--------------------------------------------------------------------------------|-----------------------------------|-------------------------------------------------------|
| LB19           | Fragmentation rate (3% per year)                                               | $3.0\text{E-}2 \pm 5.7\text{E-}3$ | $3.0\text{E-}2$ ( $2.6\text{E-}2$ - $3.4\text{E-}2$ ) |
| f_LMP          | Fraction of LMP in waste                                                       | $1.4\text{E-}1 \pm 2.7\text{E-}2$ | $1.4\text{E-}1$ ( $1.2\text{E-}1$ - $1.6\text{E-}1$ ) |
| f_burn_R1      | Fraction of mismanaged plastic waste that is open burned each year (from OECD) | $3.1\text{E-}1 \pm 0.0\text{E+}0$ | $3.1\text{E-}1$ ( $3.1\text{E-}1$ - $3.1\text{E-}1$ ) |
| f_burn_R2      |                                                                                | $3.1\text{E-}1 \pm 0.0\text{E+}0$ | $3.1\text{E-}1$ ( $3.1\text{E-}1$ - $3.1\text{E-}1$ ) |
| f_burn_R3      |                                                                                | $3.1\text{E-}1 \pm 0.0\text{E+}0$ | $3.1\text{E-}1$ ( $3.1\text{E-}1$ - $3.1\text{E-}1$ ) |
| f_inc_random   | Normal randomisation of waste fractions                                        | $1.0\text{E+}0 \pm 4.9\text{E-}2$ | $1.0\text{E+}0$ ( $9.7\text{E-}1$ - $1.0\text{E+}0$ ) |
| f_mism_random  |                                                                                | $1.0\text{E+}0 \pm 5.0\text{E-}2$ | $1.0\text{E+}0$ ( $9.7\text{E-}1$ - $1.0\text{E+}0$ ) |
| f_rec_random   |                                                                                | $1.0\text{E+}0 \pm 4.9\text{E-}2$ | $1.0\text{E+}0$ ( $9.7\text{E-}1$ - $1.0\text{E+}0$ ) |
| f_runoff_R1    | Fraction of total runoff attributed to each regions                            | $1.1\text{E-}1 \pm 0.0\text{E+}0$ | $1.1\text{E-}1$ ( $1.1\text{E-}1$ - $1.1\text{E-}1$ ) |
| f_runoff_R2    |                                                                                | $7.5\text{E-}1 \pm 0.0\text{E+}0$ | $7.5\text{E-}1$ ( $7.5\text{E-}1$ - $7.5\text{E-}1$ ) |
| f_runoff_R3    |                                                                                | $1.5\text{E-}1 \pm 0.0\text{E+}0$ | $1.5\text{E-}1$ ( $1.5\text{E-}1$ - $1.5\text{E-}1$ ) |
| f_soil_R1      | Fraction of each region surface considered as remote soil                      | $5.7\text{E-}1 \pm 0.0\text{E+}0$ | $5.7\text{E-}1$ ( $5.7\text{E-}1$ - $5.7\text{E-}1$ ) |
| f_soil_R2      |                                                                                | $6.6\text{E-}1 \pm 0.0\text{E+}0$ | $6.6\text{E-}1$ ( $6.6\text{E-}1$ - $6.6\text{E-}1$ ) |
| f_soil_R3      |                                                                                | $8.0\text{E-}1 \pm 0.0\text{E+}0$ | $8.0\text{E-}1$ ( $8.0\text{E-}1$ - $8.0\text{E-}1$ ) |
| f_ssed         | Fraction of seafloor considered as shelf sediment                              | $1.8\text{E-}1 \pm 0.0\text{E+}0$ | $1.8\text{E-}1$ ( $1.8\text{E-}1$ - $1.8\text{E-}1$ ) |

10 **Table S2:** Model parameters and their probability distribution (fluxes between boxes).

R1: S. Europe, R2: N. Africa & M. East, R3: Nile basin. Note that the “Terrestrial” compartment incorporates the terrestrial mismanaged and the remote land compartment.

| Parameter name        | Compartment from | Compartment to   | Plastic size category | Mean $\pm$ sd        | Median (IQR 25%-75%)     |
|-----------------------|------------------|------------------|-----------------------|----------------------|--------------------------|
| k_R1_P_terr_to_surf   | Terrestrial (R1) | Sea surface      | P                     | 2.5E-3 $\pm$ 1.6E-3  | 2.1E-3 (1.2E-3 - 3.4E-3) |
| k_R1_LMP_terr_to_surf | Terrestrial (R1) | Sea surface      | LMP                   | 7.2E-2 $\pm$ 1.0E-1  | 2.6E-2 (4.7E-3 - 9.7E-2) |
| k_R1_sMP_terr_to_surf | Terrestrial (R1) | Sea surface      | SMP                   | 4.4E-3 $\pm$ 1.3E-3  | 4.2E-3 (3.4E-3 - 5.2E-3) |
| k_R1_sMP_terr_to_atmo | Terrestrial (R1) | Atmosphere       | SMP                   | 2.4E-3 $\pm$ 1.0E-3  | 2.3E-3 (1.6E-3 - 3.0E-3) |
| k_R2_P_terr_to_surf   | Terrestrial (R2) | Sea surface      | P                     | 3.1E-4 $\pm$ 2.0E-4  | 2.6E-4 (1.5E-4 - 4.2E-4) |
| k_R2_LMP_terr_to_surf | Terrestrial (R2) | Sea surface      | LMP                   | 9.1E-3 $\pm$ 1.3E-2  | 3.3E-3 (6.0E-4 - 1.2E-2) |
| k_R2_sMP_terr_to_surf | Terrestrial (R2) | Sea surface      | SMP                   | 8.9E-4 $\pm$ 2.6E-4  | 8.6E-4 (6.9E-4 - 1.1E-3) |
| k_R2_sMP_terr_to_atmo | Terrestrial (R2) | Atmosphere       | SMP                   | 2.4E-3 $\pm$ 1.0E-3  | 2.3E-3 (1.6E-3 - 3.0E-3) |
| k_R3_P_terr_to_surf   | Terrestrial (R3) | Sea surface      | P                     | 4.7E-6 $\pm$ 3.0E-6  | 3.9E-6 (2.3E-6 - 6.2E-6) |
| k_R3_LMP_terr_to_surf | Terrestrial (R3) | Sea surface      | LMP                   | 1.4E-4 $\pm$ 2.0E-4  | 4.9E-5 (8.9E-6 - 1.8E-4) |
| k_R3_sMP_terr_to_surf | Terrestrial (R3) | Sea surface      | SMP                   | 3.0E-2 $\pm$ 5.7E-3  | 3.0E-2 (2.6E-2 - 3.4E-2) |
| k_R3_sMP_terr_to_atmo | Terrestrial (R3) | Atmosphere       | SMP                   | 3.0E-2 $\pm$ 5.7E-3  | 3.0E-2 (2.6E-2 - 3.4E-2) |
| k_R1_sMP_atmo_to_terr | Atmosphere       | Terrestrial (R1) | SMP                   | 5.7E+1 $\pm$ 1.8E+1  | 5.5E+1 (4.3E+1 - 7.1E+1) |
| k_R2_sMP_atmo_to_terr | Atmosphere       | Terrestrial (R2) | SMP                   | 5.7E+1 $\pm$ 1.8E+1  | 5.5E+1 (4.3E+1 - 7.1E+1) |
| k_R3_sMP_atmo_to_terr | Atmosphere       | Terrestrial (R3) | SMP                   | 5.7E+1 $\pm$ 1.8E+1  | 5.5E+1 (4.3E+1 - 7.1E+1) |
| k_sMP_atmo_to_surf    | Atmosphere       | Sea surface      | SMP                   | 4.0E+1 $\pm$ 2.4E+1  | 3.5E+1 (2.1E+1 - 5.4E+1) |
| k_sMP_surf_to_atmo    | Sea surface      | Atmosphere       | SMP                   | 1.3E+0 $\pm$ 9.2E-1  | 1.0E+0 (5.6E-1 - 1.7E+0) |
| k_P_surf_to_sand      | Sea surface      | Sandy beach      | P                     | 2.3E-1 $\pm$ 3.8E-15 | 2.3E-1 (2.3E-1 - 2.3E-1) |
| k_LMP_surf_to_sand    | Sea surface      | Sandy beach      | LMP                   | 0.0E+0 $\pm$ 0.0E+0  | 0.0E+0 (0.0E+0 - 0.0E+0) |
| k_sMP_surf_to_sand    | Sea surface      | Sandy beach      | SMP                   | 0.0E+0 $\pm$ 0.0E+0  | 0.0E+0 (0.0E+0 - 0.0E+0) |
| k_P_surf_to_ssed      | Sea surface      | Shelf sediment   | P                     | 2.0E+2 $\pm$ 0.0E+0  | 2.0E+2 (2.0E+2 - 2.0E+2) |
| k_LMP_surf_to_ssed    | Sea surface      | Shelf sediment   | LMP                   | 1.5E+4 $\pm$ 2.4E+4  | 5.1E+3 (7.9E+2 - 1.9E+4) |
| k_sMP_surf_to_ssed    | Sea surface      | Shelf sediment   | SMP                   | 1.2E+2 $\pm$ 2.5E+1  | 1.2E+2 (9.9E+1 - 1.4E+2) |
| k_P_surf_to_wcol      | Sea surface      | Water column     | P                     | 0.0E+0 $\pm$ 0.0E+0  | 0.0E+0 (0.0E+0 - 0.0E+0) |
| k_LMP_surf_to_wcol    | Sea surface      | Water column     | LMP                   | 2.5E+2 $\pm$ 0.0E+0  | 2.5E+2 (2.5E+2 - 2.5E+2) |
| k_sMP_surf_to_wcol    | Sea surface      | Water column     | SMP                   | 3.0E-2 $\pm$ 5.7E-3  | 3.0E-2 (2.6E-2 - 3.4E-2) |
| k_LMP_wcol_to_dsed    | Water column     | Deep sediment    | LMP                   | 1.0E-3 $\pm$ 6.5E-19 | 1.0E-3 (1.0E-3 - 1.0E-3) |
| k_sMP_wcol_to_dsed    | Water column     | Deep sediment    | SMP                   | 3.0E-2 $\pm$ 5.7E-3  | 3.0E-2 (2.6E-2 - 3.4E-2) |

III. Per capita plastic waste generation

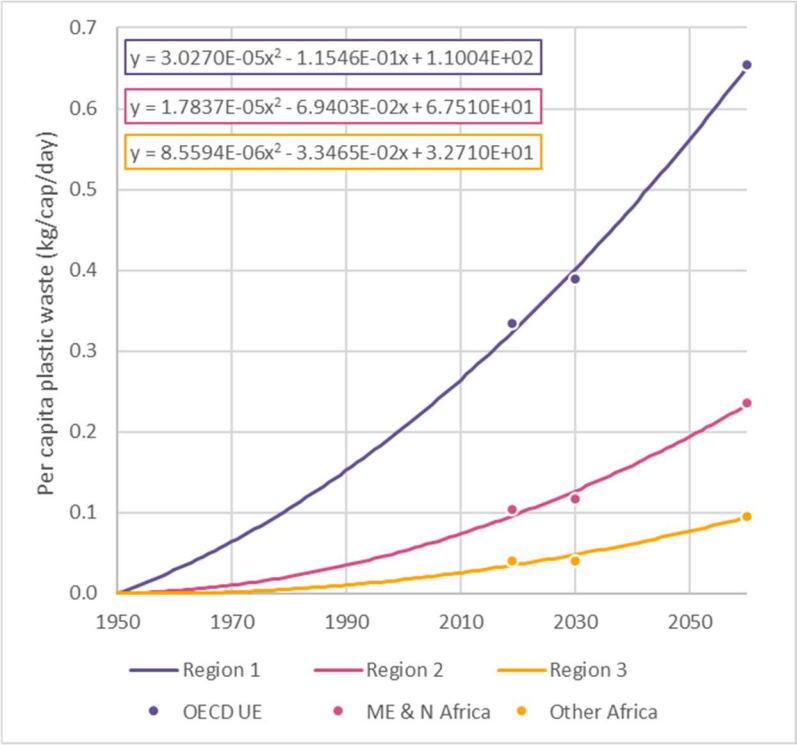

S1: Per capita plastic waste generation by region.

Dots are data points from OECD reports (OECD, 2022). Quadratic regression lines with  $y=0$  at  $x=1950$  were used to extrapolate these points to the full 1950 to 2060 range.

Region 1: S. Europe, Region 2: N. Africa & M. East, Region 3: Nile basin.

#### IV. Demography data per country

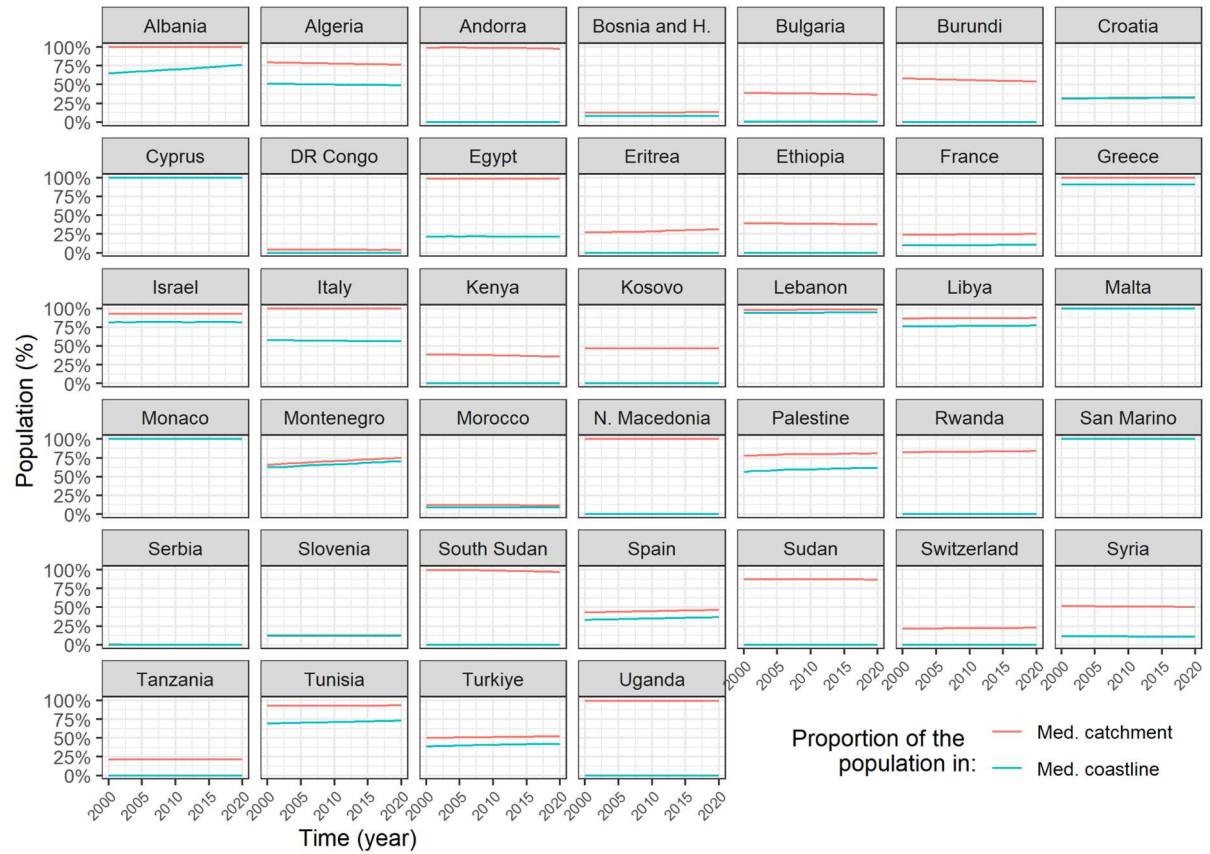

**Figure S2:** Fraction of the country population living inside the Mediterranean (Med.) catchment and 50 km coastline from 2000 to 2020. Obtained using georeferenced population data from WorldPop database (WorldPop, 2020).

This fraction is constant from 2000 to 2020 for most countries, that is why we decided to consider it constraint for the whole study timeframe. Increasing fraction observed for low population countries (such as Albania or Montenegro) should have a negligible impact on the overall population estimation.

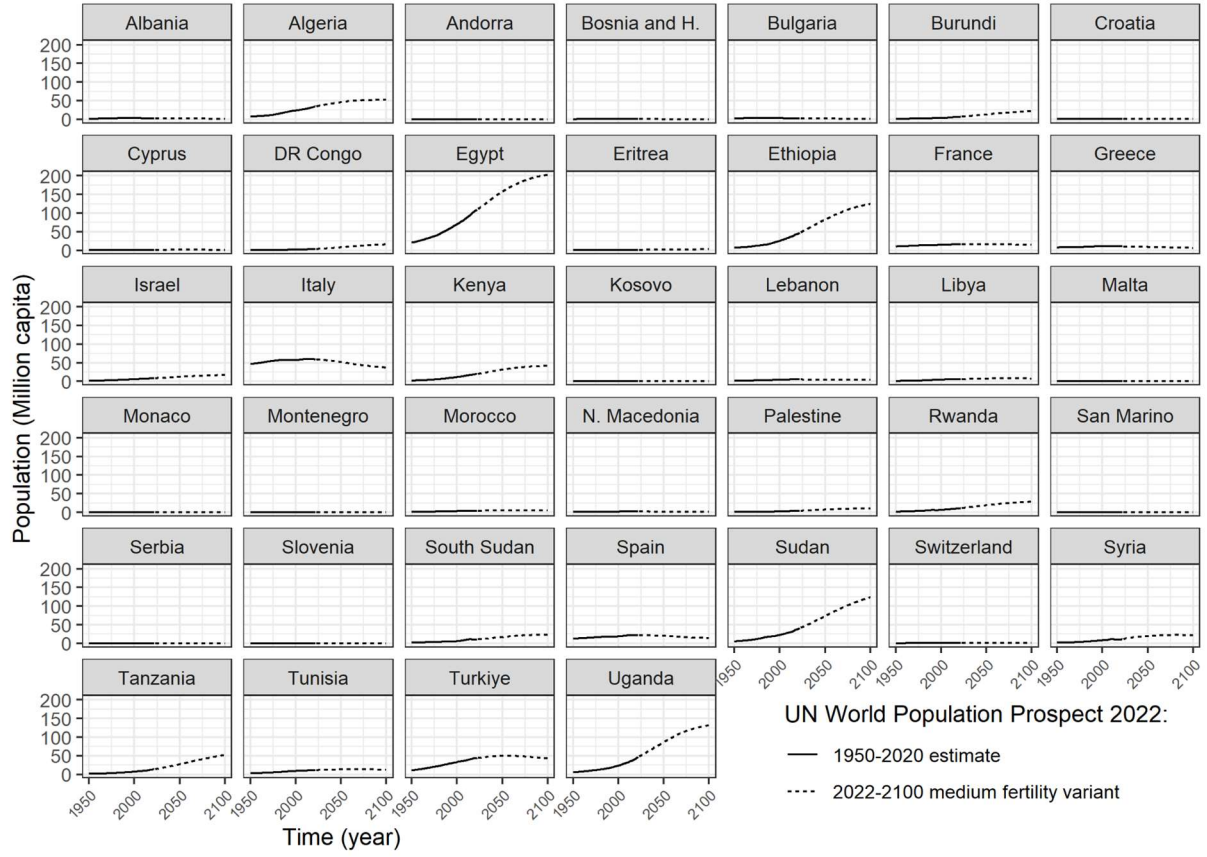

**Figure S3:** Population inside the Mediterranean catchment. Obtained using UN World Population Prospect 2022 (United Nations, 2022), combined with extrapolation from Figure S.4.1.

## V. Sediment extrapolation

To estimate the quantity of LMP accumulated from 1950 ( $t=0$ ) to 2015 ( $t=T[y]$ ) in the marine sediment, an extrapolation method was used. The available observations provide plastic concentrations  $q$  [ $\text{g.m}^{-3}$ ] in the  $d$  [m] first meter of sediment,  $d$  being the sampling depth of the core.

The  $d$  first meters of sediment were deposited on the seafloor during an accumulation time  $\Delta t$  [y]:

$$\Delta t = \frac{d}{S_r} \quad \text{with } S_r [\text{m.y}^{-1}] \text{ the sedimentation rate of the study area.}$$

From 1950 ( $t=0$ ) to 2015 ( $t=T$ ), a sediment layer of height  $D$  [m] was deposited on the seafloor:

$$D = T \cdot S_r$$

Let's convert the volumetric concentration  $q$  [ $\text{g.m}^{-3}$ ] into an observed concentration per surface unit  $c_{obs}$  [ $\text{g.m}^{-2}$ ]:

$$c_{obs} = q \cdot d$$

This quantity  $c_{obs}$  corresponds to the plastic mass accumulated on  $1\text{m}^2$  of seafloor during the  $\Delta t$  years before 2015.

Let's introduce a plastic sedimentation rate  $S$  [ $\text{g.m}^{-2}.\text{y}^{-1}$ ], i.e. a plastic flux from the water column to  $1\text{m}^2$  of seafloor. The function  $S$  is unknown, but we can suppose that it is approximated by a quadratic equation according to the model of Sonke et al., 2022 (Sonke et al., 2022). Furthermore,  $S(t \leq 0) = 0$  since no plastic contaminated the environment before 1950. Therefore:

$$S(t \geq 0) = a.t^2 \quad \text{and} \quad S(t < 0) = 0 \quad \text{with } a \text{ a parameter to determine.}$$

Let's compute the parameter  $a$  in order to observe a concentration  $c_{obs}$  during the last  $\Delta t$  years. The quantity of plastic precipitated over one unit of surface between  $T-\Delta t$  and  $T$  is can be expressed as:

$$c_{obs} = \int_{t=T-\Delta t}^{t=T} S(t).dt$$

- If  $d \leq D$  (the core only sampled sediment deposited after 1950) :

$$c_{obs} = \int_{t=T-\Delta t}^{t=T} S(t).dt = \int_{t=T-\Delta t}^{t=T} a.t^2.dt = \frac{a}{3} [t^3]_{T-\Delta t}^T = \frac{a}{3} [T^3 - (T - \Delta t)^3]$$

Knowing the apparent surface concentration  $c_{obs}$ , we can then find the parameter  $a$  that define the precipitation function  $S$ :

$$a = c_{obs} \cdot \frac{3}{T^3 - (T - \Delta t)^3}$$

- We can then compute  $C$  [ $\text{g.m}^{-2}$ ], the plastic mass accumulated on  $1\text{m}^2$  of seafloor from 1950 ( $t=0$ ) to 2015 ( $t=T$ ) :

$$C = \int_{t=0}^{t=T} S(t).dt = a \cdot \int_{t=0}^{t=T} t^2 \cdot dt = \frac{a}{3} [t^3]_0^T = \frac{a}{3} \cdot T^3 = c_{obs} \cdot \frac{T^3}{T^3 - (T - \Delta t)^3}$$

Expressing  $T$  and  $\Delta t$  according to  $D$  and  $d$ , we have:

$$C = c_{obs} \frac{1}{1 - (1 - \frac{d}{D})^3}$$

- if  $d > D$  (the core sampled some sediment deposited before 1950 that did not contain any plastics):

$$c_{obs} = \int_{t=T-\Delta t}^{t=T} S(t).dt = \int_{t=T-\Delta t}^{t=0} S(t).dt + \int_{t=0}^{t=T} S(t).dt = 0 + \int_{t=0}^{t=T} S(t).dt$$

since  $S$  is null before 1950 (no plastic contamination yet)

$$\Rightarrow c_{obs} = a \cdot \int_{t=0}^{t=T} t^2 \cdot dt = \frac{a}{3} [t^3]_0^T = \frac{a}{3} \cdot T^3 \quad \Rightarrow a = c_{obs} \cdot \frac{3}{T^3}$$

$$\Rightarrow C = \int_{t=0}^{t=T} S(t).dt = a \cdot \int_{t=0}^{t=T} t^2 \cdot dt = \frac{a}{3} [t^3]_0^T = \frac{a}{3} \cdot T^3 = c_{obs}$$

Therefore:

$$\begin{aligned} C &= q \cdot \frac{d}{1 - (1 - \frac{d}{D})^3} & \text{if } d \leq D \\ C &= q \cdot d & \text{if } d > D \end{aligned} \tag{S1}$$

75 To estimate  $M$  [Mt] the quantity of plastic stoked in the Mediterranean seafloor, we multiply  $C$  by the surface of the sediment  $A$  [km<sup>2</sup>]:

$$M = A \cdot C \cdot 10^6$$

## VI. Geographical distribution of plastic runoff

**Table S3:** Comparison between different studies providing geographical distribution of plastic runoff to sea.

|                                                          | Lebreton et al., 2017                                                                                                          | Meijer et al., 2021                                                                                                                                                             | Nyberg et al., 2023                                                                                                                                    | Cózar et al., 2024                                                                                                                            |
|----------------------------------------------------------|--------------------------------------------------------------------------------------------------------------------------------|---------------------------------------------------------------------------------------------------------------------------------------------------------------------------------|--------------------------------------------------------------------------------------------------------------------------------------------------------|-----------------------------------------------------------------------------------------------------------------------------------------------|
| # of river (global)                                      | 40 760                                                                                                                         | 31 819                                                                                                                                                                          | 156 163                                                                                                                                                | -                                                                                                                                             |
| # of river (Med.)                                        | 2 724 (6.7%)                                                                                                                   | 1 328 (4.2%)                                                                                                                                                                    | 4 004 (2.6%)                                                                                                                                           | -                                                                                                                                             |
| Global flux (Tg/y)                                       | 1.41                                                                                                                           | 1.00                                                                                                                                                                            | 19.19                                                                                                                                                  | -                                                                                                                                             |
| Med. flux (Tg/y)                                         | 0.001 (0.1%)                                                                                                                   | 0.02 (2.3%)                                                                                                                                                                     | 1.24 (6.5%)                                                                                                                                            | -                                                                                                                                             |
| Regional contribution to plastic runoff from land to sea | S.Eu : 16.3%<br>N. Af : 60.1%<br>Nile : 23.7%                                                                                  | S.Eu : 5.6 %<br>N. Af : 82.3 %<br>Nile : 12.1 %                                                                                                                                 | S.Eu : 11.0 %<br>N. Af : 78.5 %<br>Nile : 10.5 %                                                                                                       | S.Eu : 11.0 %<br>N. Af : 78.5 %<br>Nile : 10.5 %                                                                                              |
| Calibration                                              | 13 rivers<br>30 records<br>No african rivers                                                                                   | 67 rivers<br>136 records<br>No african rivers                                                                                                                                   | No calibration                                                                                                                                         | Calibration with Mediterranean data over 75 months                                                                                            |
| Plastic type                                             | P + LMP                                                                                                                        | P                                                                                                                                                                               | Not mentioned                                                                                                                                          | P                                                                                                                                             |
| Runoff                                                   | Monthly runoff used<br>Dams and floods are modeled                                                                             | Annual wind and precipitation used,<br>Land use.<br>Don't account for dams, nor for flood                                                                                       | Do not account for water discharge change, but for river connectivity                                                                                  | Account for precipitation and runoff (at least monthly)                                                                                       |
| Method                                                   | Population density + MMPW statistics generates flux that follows gradients and can be blocked by a dam. Monthly runoff is used | Probability model<br>$P(\text{MMPW emission to the ocean}) = P(\text{mobilization on land}) * P(\text{transport from land to river}) * P(\text{transport from river to ocean})$ | MMPW input per km <sup>2</sup> is computed using the Lebreton and Andrady method.<br>Connectivity of river is computed and maximum discharge estimated | Optimize plastic runoff distribution around the mediterranean coast with hotspots of floating macroplastics identified via satellite imaging. |
| Positive point                                           | Include dams<br>Include monthly runoff and some data during floods                                                             | Include land use, wind and annual runoff                                                                                                                                        | High number of rivers                                                                                                                                  | Calibrated on Mediterranean observation<br>Accounts for precipitation and runoff                                                              |
| Negative point                                           | Low number of calibration points (30)<br>No african rivers<br>Only 1 Mediterranean river (Po)                                  | Don't account for dams nor floods.<br>No african rivers<br>Only 2 Mediterranean rivers for calibration (and 2 others for validation)                                            | No calibration<br>Don't account for runoff                                                                                                             | Still a proof of concept<br>Calibrated on proxy (macro litter hotspots)                                                                       |



## VII. Per capita results

85 **Table S4.** Comparison of per capita plastic leakage with Global estimate and between Global estimations and Mediterranean regions.

|                                     | Unit \ Year | Global<br>(From Sonke <i>et al.</i> , 2024 (Sonke et al., 2024)) |       | Mediterranean region |      | S. Europe |      | N. Africa & M. East |      | Nile basin |        |
|-------------------------------------|-------------|------------------------------------------------------------------|-------|----------------------|------|-----------|------|---------------------|------|------------|--------|
|                                     |             | 2023                                                             | 2060  | 2023                 | 2060 | 2023      | 2060 | 2023                | 2060 | 2023       | 2060   |
| Population                          | M capita    | 8119                                                             | 10067 | 536                  | 775  | 124       | 107  | 140                 | 186  | 273        | 482    |
| Plastic waste generation            | Mt/y        | 272                                                              | 656   | 26                   | 59   | 16        | 26   | 6                   | 16   | 4          | 17     |
|                                     | kg/y/capita | 34                                                               | 65    | 49                   | 76   | 129       | 239  | 40                  | 86   | 15         | 35     |
| Mismanaged plastic waste generation | Mt/y        | 75                                                               | 148   | 5.5                  | 11.5 | 0.8       | 0.2  | 2.8                 | 5.5  | 2.0        | 5.8    |
|                                     | kg/y/capita | 9                                                                | 15    | 10.3                 | 14.8 | 6.5       | 1.9  | 20.0                | 29.6 | 7.3        | 12.0   |
| Plastic runoff to sea               | Mt/y        | 18                                                               | 43    | 0.4                  | 0.5  | 0.30      | 0.27 | 0.1                 | 0.2  | 0.0005     | 0.0027 |
|                                     | kg/y/capita | 2.2                                                              | 4.3   | 0.7                  | 0.6  | 2.4       | 2.5  | 0.4                 | 1.1  | 0.0018     | 0.0055 |

## VIII. Total marine plastic

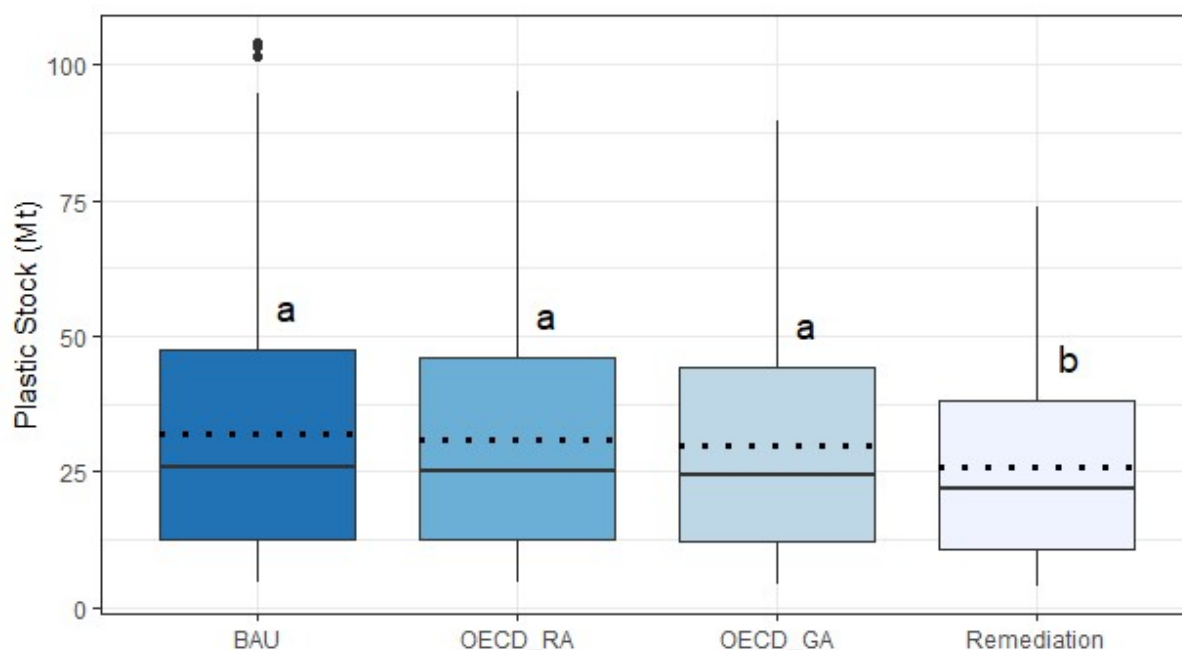

90 **Figure S4:** Total marine plastic in 2060 according to the 4 modelled scenarios. Letters indicate significance according to the Dunn post-hoc test. Dotted lines represent the mean, and solid lines the median.

## BIBLIOGRAPHY

- Cózar, A., Arias, M., Suaria, G., Viejo, J., Aliani, S., Koutroulis, A., Delaney, J., Bonnery, G., Macías, D., De Vries, R., Sumerot, R., Morales-Caselles, C., Turiel, A., González-Fernández, D., and Corradi, P.: Proof of concept for a new sensor to monitor marine litter from space, *Nat. Commun.*, 15, 4637, <https://doi.org/10.1038/s41467-024-48674-7>, 2024.
- Jambeck, J. R., Geyer, R., Wilcox, C., Siegler, T. R., Perryman, M., Andrady, A., Narayan, R., and Law, K. L.: Plastic waste inputs from land into the ocean, *Science*, 347, 768–771, <https://doi.org/10.1126/science.1260352>, 2015.
- 100 Lebreton, L. C. M., van der Zwet, J., Damsteeg, J.-W., Slat, B., Andrady, A., and Reisser, J.: River plastic emissions to the world’s oceans, *Nat. Commun.*, 8, 15611, <https://doi.org/10.1038/ncomms15611>, 2017.
- Meijer, L. J. J., van Emmerik, T., van der Ent, R., Schmidt, C., and Lebreton, L.: More than 1000 rivers account for 80% of global riverine plastic emissions into the ocean, *Sci. Adv.*, 7, eaaz5803, <https://doi.org/10.1126/sciadv.aaz5803>, 2021.
- 105 Nyberg, B., Harris, P. T., Kane, I., and Maes, T.: Leaving a plastic legacy: Current and future scenarios for mismanaged plastic waste in rivers, *Sci. Total Environ.*, 869, 161821, <https://doi.org/10.1016/j.scitotenv.2023.161821>, 2023.
- OECD: Global Plastics Outlook: Policy Scenarios to 2060, 2022.
- 110 Sonke, J., Koenig, A., Segur, T., and Yakovenko, N.: Global environmental plastics dispersal under OECD policy scenarios towards 2060, <https://doi.org/10.31223/X5W990>, 1 April 2024.
- Sonke, J. E., Koenig, A. M., Yakovenko, N., Hagelskjær, O., Margenat, H., Hansson, S. V., De Vleeschouwer, F., Magand, O., Le Roux, G., and Thomas, J. L.: A mass budget and box model of global plastics cycling, degradation and dispersal in the land-ocean-atmosphere system, *Microplastics Nanoplastics*, 2, 28, <https://doi.org/10.1186/s43591-022-00048-w>, 2022.
- 115 United Nations: World Population Prospects 2022, 2022.
- WorldPop: Unconstrained individual countries 2000-2020 UN adjusted (1km resolution), 2020.
